# Supplementary material for: Validity of the older people quality of life-7 domains (OQoL-7) scale
Source: Springer Nature journal article supplement (doi:10.1186/s12955-020-01589-5), 2020-10-14
Supplement: MOESM1 [file 18484208]

### YOUR OPINION ON QUALITY OF LIFE

There are many factors that determine quality of life. For instance, health but also social network or financial resources can influence it. All factors are not equally important for all of us; for instance, living alone can be problematic for some people but not others. In the following questions, we wish to know what is important for your quality of life, and to what extent some factors are problematic.

**A. How important are the following factors to your quality of life?**

*Answer each line*

|                                                          | Very<br>high                          | Quite<br>high                         | Quite<br>low                          | Very<br>low                           |
|----------------------------------------------------------|---------------------------------------|---------------------------------------|---------------------------------------|---------------------------------------|
| 1. Financial resources                                   | <input type="checkbox"/> <sub>1</sub> | <input type="checkbox"/> <sub>2</sub> | <input type="checkbox"/> <sub>3</sub> | <input type="checkbox"/> <sub>4</sub> |
| 2. Housing comfort                                       | <input type="checkbox"/> <sub>1</sub> | <input type="checkbox"/> <sub>2</sub> | <input type="checkbox"/> <sub>3</sub> | <input type="checkbox"/> <sub>4</sub> |
| 3. Sufficient, good quality food                         | <input type="checkbox"/> <sub>1</sub> | <input type="checkbox"/> <sub>2</sub> | <input type="checkbox"/> <sub>3</sub> | <input type="checkbox"/> <sub>4</sub> |
| 4. Friendly atmosphere meals                             | <input type="checkbox"/> <sub>1</sub> | <input type="checkbox"/> <sub>2</sub> | <input type="checkbox"/> <sub>3</sub> | <input type="checkbox"/> <sub>4</sub> |
| 5. Couples' relationships                                | <input type="checkbox"/> <sub>1</sub> | <input type="checkbox"/> <sub>2</sub> | <input type="checkbox"/> <sub>3</sub> | <input type="checkbox"/> <sub>4</sub> |
| 6. Family relationships                                  | <input type="checkbox"/> <sub>1</sub> | <input type="checkbox"/> <sub>2</sub> | <input type="checkbox"/> <sub>3</sub> | <input type="checkbox"/> <sub>4</sub> |
| 7. Friendship relationships                              | <input type="checkbox"/> <sub>1</sub> | <input type="checkbox"/> <sub>2</sub> | <input type="checkbox"/> <sub>3</sub> | <input type="checkbox"/> <sub>4</sub> |
| 8. Intergenerational relationships                       | <input type="checkbox"/> <sub>1</sub> | <input type="checkbox"/> <sub>2</sub> | <input type="checkbox"/> <sub>3</sub> | <input type="checkbox"/> <sub>4</sub> |
| 9. Integration into a group, association or society      | <input type="checkbox"/> <sub>1</sub> | <input type="checkbox"/> <sub>2</sub> | <input type="checkbox"/> <sub>3</sub> | <input type="checkbox"/> <sub>4</sub> |
| 10. Self-esteem                                          | <input type="checkbox"/> <sub>1</sub> | <input type="checkbox"/> <sub>2</sub> | <input type="checkbox"/> <sub>3</sub> | <input type="checkbox"/> <sub>4</sub> |
| 11. Being heard and respected                            | <input type="checkbox"/> <sub>1</sub> | <input type="checkbox"/> <sub>2</sub> | <input type="checkbox"/> <sub>3</sub> | <input type="checkbox"/> <sub>4</sub> |
| 12. Cultural and leisure activities                      | <input type="checkbox"/> <sub>1</sub> | <input type="checkbox"/> <sub>2</sub> | <input type="checkbox"/> <sub>3</sub> | <input type="checkbox"/> <sub>4</sub> |
| 13. Not being dependent on help in daily life            | <input type="checkbox"/> <sub>1</sub> | <input type="checkbox"/> <sub>2</sub> | <input type="checkbox"/> <sub>3</sub> | <input type="checkbox"/> <sub>4</sub> |
| 14. Mobility, being able to travel alone                 | <input type="checkbox"/> <sub>1</sub> | <input type="checkbox"/> <sub>2</sub> | <input type="checkbox"/> <sub>3</sub> | <input type="checkbox"/> <sub>4</sub> |
| 15. Being able to use public transport alone             | <input type="checkbox"/> <sub>1</sub> | <input type="checkbox"/> <sub>2</sub> | <input type="checkbox"/> <sub>3</sub> | <input type="checkbox"/> <sub>4</sub> |
| 16. Being able to travel                                 | <input type="checkbox"/> <sub>1</sub> | <input type="checkbox"/> <sub>2</sub> | <input type="checkbox"/> <sub>3</sub> | <input type="checkbox"/> <sub>4</sub> |
| 17. Physical and mental health                           | <input type="checkbox"/> <sub>1</sub> | <input type="checkbox"/> <sub>2</sub> | <input type="checkbox"/> <sub>3</sub> | <input type="checkbox"/> <sub>4</sub> |
| 18. Access to health care and prevention                 | <input type="checkbox"/> <sub>1</sub> | <input type="checkbox"/> <sub>2</sub> | <input type="checkbox"/> <sub>3</sub> | <input type="checkbox"/> <sub>4</sub> |
| 19. Adequate health insurance coverage                   | <input type="checkbox"/> <sub>1</sub> | <input type="checkbox"/> <sub>2</sub> | <input type="checkbox"/> <sub>3</sub> | <input type="checkbox"/> <sub>4</sub> |
| 20. Safety at home                                       | <input type="checkbox"/> <sub>1</sub> | <input type="checkbox"/> <sub>2</sub> | <input type="checkbox"/> <sub>3</sub> | <input type="checkbox"/> <sub>4</sub> |
| 21. Safety in the street                                 | <input type="checkbox"/> <sub>1</sub> | <input type="checkbox"/> <sub>2</sub> | <input type="checkbox"/> <sub>3</sub> | <input type="checkbox"/> <sub>4</sub> |
| 22. Religion, philosophy or spiritual life               | <input type="checkbox"/> <sub>1</sub> | <input type="checkbox"/> <sub>2</sub> | <input type="checkbox"/> <sub>3</sub> | <input type="checkbox"/> <sub>4</sub> |
| 23. Being able to exercise one's creativity, share ideas | <input type="checkbox"/> <sub>1</sub> | <input type="checkbox"/> <sub>2</sub> | <input type="checkbox"/> <sub>3</sub> | <input type="checkbox"/> <sub>4</sub> |
| 24. Being able to decide on issues of daily life         | <input type="checkbox"/> <sub>1</sub> | <input type="checkbox"/> <sub>2</sub> | <input type="checkbox"/> <sub>3</sub> | <input type="checkbox"/> <sub>4</sub> |
| 25. Being able to manage money matters alone             | <input type="checkbox"/> <sub>1</sub> | <input type="checkbox"/> <sub>2</sub> | <input type="checkbox"/> <sub>3</sub> | <input type="checkbox"/> <sub>4</sub> |
| 26. Being useful to others                               | <input type="checkbox"/> <sub>1</sub> | <input type="checkbox"/> <sub>2</sub> | <input type="checkbox"/> <sub>3</sub> | <input type="checkbox"/> <sub>4</sub> |
| 27. Being able to express one's opinion, to vote, etc.   | <input type="checkbox"/> <sub>1</sub> | <input type="checkbox"/> <sub>2</sub> | <input type="checkbox"/> <sub>3</sub> | <input type="checkbox"/> <sub>4</sub> |
| 28. Being well informed to meet one's needs and decide   | <input type="checkbox"/> <sub>1</sub> | <input type="checkbox"/> <sub>2</sub> | <input type="checkbox"/> <sub>3</sub> | <input type="checkbox"/> <sub>4</sub> |

**B. Do you currently feel discomfort or dissatisfaction with any of the following?**

*Answer each line*

|     |                                                      | A lot                                 | A little                              | Not at all                            |
|-----|------------------------------------------------------|---------------------------------------|---------------------------------------|---------------------------------------|
| 1.  | Financial resources                                  | <input type="checkbox"/> <sub>1</sub> | <input type="checkbox"/> <sub>2</sub> | <input type="checkbox"/> <sub>3</sub> |
| 2.  | Housing comfort                                      | <input type="checkbox"/> <sub>1</sub> | <input type="checkbox"/> <sub>2</sub> | <input type="checkbox"/> <sub>3</sub> |
| 3.  | Sufficient, good quality food                        | <input type="checkbox"/> <sub>1</sub> | <input type="checkbox"/> <sub>2</sub> | <input type="checkbox"/> <sub>3</sub> |
| 4.  | Friendly atmosphere meals                            | <input type="checkbox"/> <sub>1</sub> | <input type="checkbox"/> <sub>2</sub> | <input type="checkbox"/> <sub>3</sub> |
| 5.  | Couples' relationships                               | <input type="checkbox"/> <sub>1</sub> | <input type="checkbox"/> <sub>2</sub> | <input type="checkbox"/> <sub>3</sub> |
| 6.  | Family relationships                                 | <input type="checkbox"/> <sub>1</sub> | <input type="checkbox"/> <sub>2</sub> | <input type="checkbox"/> <sub>3</sub> |
| 7.  | Friendship relationships                             | <input type="checkbox"/> <sub>1</sub> | <input type="checkbox"/> <sub>2</sub> | <input type="checkbox"/> <sub>3</sub> |
| 8.  | Intergenerational relationships                      | <input type="checkbox"/> <sub>1</sub> | <input type="checkbox"/> <sub>2</sub> | <input type="checkbox"/> <sub>3</sub> |
| 9.  | Integration into a group, association or society     | <input type="checkbox"/> <sub>1</sub> | <input type="checkbox"/> <sub>2</sub> | <input type="checkbox"/> <sub>3</sub> |
| 10. | Self-esteem                                          | <input type="checkbox"/> <sub>1</sub> | <input type="checkbox"/> <sub>2</sub> | <input type="checkbox"/> <sub>3</sub> |
| 11. | Being heard and respected                            | <input type="checkbox"/> <sub>1</sub> | <input type="checkbox"/> <sub>2</sub> | <input type="checkbox"/> <sub>3</sub> |
| 12. | Cultural and leisure activities                      | <input type="checkbox"/> <sub>1</sub> | <input type="checkbox"/> <sub>2</sub> | <input type="checkbox"/> <sub>3</sub> |
| 13. | Not being dependent on help in daily life            | <input type="checkbox"/> <sub>1</sub> | <input type="checkbox"/> <sub>2</sub> | <input type="checkbox"/> <sub>3</sub> |
| 14. | Mobility, being able to travel alone                 | <input type="checkbox"/> <sub>1</sub> | <input type="checkbox"/> <sub>2</sub> | <input type="checkbox"/> <sub>3</sub> |
| 15. | Being able to use public transport alone             | <input type="checkbox"/> <sub>1</sub> | <input type="checkbox"/> <sub>2</sub> | <input type="checkbox"/> <sub>3</sub> |
| 16. | Being able to travel                                 | <input type="checkbox"/> <sub>1</sub> | <input type="checkbox"/> <sub>2</sub> | <input type="checkbox"/> <sub>3</sub> |
| 17. | Physical and mental health                           | <input type="checkbox"/> <sub>1</sub> | <input type="checkbox"/> <sub>2</sub> | <input type="checkbox"/> <sub>3</sub> |
| 18. | Access to health care and prevention                 | <input type="checkbox"/> <sub>1</sub> | <input type="checkbox"/> <sub>2</sub> | <input type="checkbox"/> <sub>3</sub> |
| 19. | Adequate health insurance coverage                   | <input type="checkbox"/> <sub>1</sub> | <input type="checkbox"/> <sub>2</sub> | <input type="checkbox"/> <sub>3</sub> |
| 20. | Safety at home                                       | <input type="checkbox"/> <sub>1</sub> | <input type="checkbox"/> <sub>2</sub> | <input type="checkbox"/> <sub>3</sub> |
| 21. | Safety in the street                                 | <input type="checkbox"/> <sub>1</sub> | <input type="checkbox"/> <sub>2</sub> | <input type="checkbox"/> <sub>3</sub> |
| 22. | Religion, philosophy or spiritual life               | <input type="checkbox"/> <sub>1</sub> | <input type="checkbox"/> <sub>2</sub> | <input type="checkbox"/> <sub>3</sub> |
| 23. | Being able to exercise one's creativity, share ideas | <input type="checkbox"/> <sub>1</sub> | <input type="checkbox"/> <sub>2</sub> | <input type="checkbox"/> <sub>3</sub> |
| 24. | Being able to decide on issues of daily life         | <input type="checkbox"/> <sub>1</sub> | <input type="checkbox"/> <sub>2</sub> | <input type="checkbox"/> <sub>3</sub> |
| 25. | Being able to manage money matters alone             | <input type="checkbox"/> <sub>1</sub> | <input type="checkbox"/> <sub>2</sub> | <input type="checkbox"/> <sub>3</sub> |
| 26. | Being useful to others                               | <input type="checkbox"/> <sub>1</sub> | <input type="checkbox"/> <sub>2</sub> | <input type="checkbox"/> <sub>3</sub> |
| 27. | Being able to express one's opinion, to vote, etc.   | <input type="checkbox"/> <sub>1</sub> | <input type="checkbox"/> <sub>2</sub> | <input type="checkbox"/> <sub>3</sub> |
| 28. | Being well informed to meet one's needs and decide   | <input type="checkbox"/> <sub>1</sub> | <input type="checkbox"/> <sub>2</sub> | <input type="checkbox"/> <sub>3</sub> |

### VOTRE AVIS SUR LA QUALITÉ DE VIE

Les facteurs qui déterminent la qualité de vie sont nombreux. Par exemple la santé, mais aussi les liens sociaux ou les moyens financiers peuvent l'influencer. Tout n'a pas la même importance pour chacun de nous ; par exemple, être seul·e peut poser problème à certaines personnes et non à d'autres. Dans les questions qui suivent, nous souhaitons connaître ce qui est important pour votre qualité de vie, et dans quelle mesure certains facteurs posent problème.

**A. Quelle importance accordez-vous aux facteurs suivants, pour votre qualité de vie ?**

Répondre à chaque ligne

|                                                                  | Très<br>grande                        | Plutôt<br>grande                      | Plutôt<br>faible                      | Très<br>faible                        |
|------------------------------------------------------------------|---------------------------------------|---------------------------------------|---------------------------------------|---------------------------------------|
| 1. Les ressources financières                                    | <input type="checkbox"/> <sub>1</sub> | <input type="checkbox"/> <sub>2</sub> | <input type="checkbox"/> <sub>3</sub> | <input type="checkbox"/> <sub>4</sub> |
| 2. Le confort du logement                                        | <input type="checkbox"/> <sub>1</sub> | <input type="checkbox"/> <sub>2</sub> | <input type="checkbox"/> <sub>3</sub> | <input type="checkbox"/> <sub>4</sub> |
| 3. Une alimentation de qualité et en suffisance                  | <input type="checkbox"/> <sub>1</sub> | <input type="checkbox"/> <sub>2</sub> | <input type="checkbox"/> <sub>3</sub> | <input type="checkbox"/> <sub>4</sub> |
| 4. L'ambiance conviviale des repas                               | <input type="checkbox"/> <sub>1</sub> | <input type="checkbox"/> <sub>2</sub> | <input type="checkbox"/> <sub>3</sub> | <input type="checkbox"/> <sub>4</sub> |
| 5. Les relations de couple                                       | <input type="checkbox"/> <sub>1</sub> | <input type="checkbox"/> <sub>2</sub> | <input type="checkbox"/> <sub>3</sub> | <input type="checkbox"/> <sub>4</sub> |
| 6. Les relations familiales                                      | <input type="checkbox"/> <sub>1</sub> | <input type="checkbox"/> <sub>2</sub> | <input type="checkbox"/> <sub>3</sub> | <input type="checkbox"/> <sub>4</sub> |
| 7. Les relations amicales                                        | <input type="checkbox"/> <sub>1</sub> | <input type="checkbox"/> <sub>2</sub> | <input type="checkbox"/> <sub>3</sub> | <input type="checkbox"/> <sub>4</sub> |
| 8. Les relations entre générations                               | <input type="checkbox"/> <sub>1</sub> | <input type="checkbox"/> <sub>2</sub> | <input type="checkbox"/> <sub>3</sub> | <input type="checkbox"/> <sub>4</sub> |
| 9. L'intégration à un groupe, une association, une société       | <input type="checkbox"/> <sub>1</sub> | <input type="checkbox"/> <sub>2</sub> | <input type="checkbox"/> <sub>3</sub> | <input type="checkbox"/> <sub>4</sub> |
| 10. L'estime de soi                                              | <input type="checkbox"/> <sub>1</sub> | <input type="checkbox"/> <sub>2</sub> | <input type="checkbox"/> <sub>3</sub> | <input type="checkbox"/> <sub>4</sub> |
| 11. Être écouté·e et respecté·e                                  | <input type="checkbox"/> <sub>1</sub> | <input type="checkbox"/> <sub>2</sub> | <input type="checkbox"/> <sub>3</sub> | <input type="checkbox"/> <sub>4</sub> |
| 12. Les activités culturelles et de loisirs                      | <input type="checkbox"/> <sub>1</sub> | <input type="checkbox"/> <sub>2</sub> | <input type="checkbox"/> <sub>3</sub> | <input type="checkbox"/> <sub>4</sub> |
| 13. Ne pas dépendre d'aide dans sa vie quotidienne               | <input type="checkbox"/> <sub>1</sub> | <input type="checkbox"/> <sub>2</sub> | <input type="checkbox"/> <sub>3</sub> | <input type="checkbox"/> <sub>4</sub> |
| 14. La mobilité, pouvoir se déplacer seul·e                      | <input type="checkbox"/> <sub>1</sub> | <input type="checkbox"/> <sub>2</sub> | <input type="checkbox"/> <sub>3</sub> | <input type="checkbox"/> <sub>4</sub> |
| 15. Pouvoir utiliser les transports publics seul·e               | <input type="checkbox"/> <sub>1</sub> | <input type="checkbox"/> <sub>2</sub> | <input type="checkbox"/> <sub>3</sub> | <input type="checkbox"/> <sub>4</sub> |
| 16. Pouvoir voyager                                              | <input type="checkbox"/> <sub>1</sub> | <input type="checkbox"/> <sub>2</sub> | <input type="checkbox"/> <sub>3</sub> | <input type="checkbox"/> <sub>4</sub> |
| 17. La santé physique et psychique                               | <input type="checkbox"/> <sub>1</sub> | <input type="checkbox"/> <sub>2</sub> | <input type="checkbox"/> <sub>3</sub> | <input type="checkbox"/> <sub>4</sub> |
| 18. L'accès aux soins et à la prévention                         | <input type="checkbox"/> <sub>1</sub> | <input type="checkbox"/> <sub>2</sub> | <input type="checkbox"/> <sub>3</sub> | <input type="checkbox"/> <sub>4</sub> |
| 19. Avoir une bonne assurance pour les frais de santé            | <input type="checkbox"/> <sub>1</sub> | <input type="checkbox"/> <sub>2</sub> | <input type="checkbox"/> <sub>3</sub> | <input type="checkbox"/> <sub>4</sub> |
| 20. La sécurité chez soi                                         | <input type="checkbox"/> <sub>1</sub> | <input type="checkbox"/> <sub>2</sub> | <input type="checkbox"/> <sub>3</sub> | <input type="checkbox"/> <sub>4</sub> |
| 21. La sécurité dans la rue                                      | <input type="checkbox"/> <sub>1</sub> | <input type="checkbox"/> <sub>2</sub> | <input type="checkbox"/> <sub>3</sub> | <input type="checkbox"/> <sub>4</sub> |
| 22. La religion, la philosophie, la vie spirituelle              | <input type="checkbox"/> <sub>1</sub> | <input type="checkbox"/> <sub>2</sub> | <input type="checkbox"/> <sub>3</sub> | <input type="checkbox"/> <sub>4</sub> |
| 23. Pouvoir exercer sa créativité, partager des idées            | <input type="checkbox"/> <sub>1</sub> | <input type="checkbox"/> <sub>2</sub> | <input type="checkbox"/> <sub>3</sub> | <input type="checkbox"/> <sub>4</sub> |
| 24. Pouvoir décider de sa vie quotidienne                        | <input type="checkbox"/> <sub>1</sub> | <input type="checkbox"/> <sub>2</sub> | <input type="checkbox"/> <sub>3</sub> | <input type="checkbox"/> <sub>4</sub> |
| 25. Pouvoir gérer seul·e ses affaires d'argent                   | <input type="checkbox"/> <sub>1</sub> | <input type="checkbox"/> <sub>2</sub> | <input type="checkbox"/> <sub>3</sub> | <input type="checkbox"/> <sub>4</sub> |
| 26. Être utile aux autres                                        | <input type="checkbox"/> <sub>1</sub> | <input type="checkbox"/> <sub>2</sub> | <input type="checkbox"/> <sub>3</sub> | <input type="checkbox"/> <sub>4</sub> |
| 27. Pouvoir exprimer son opinion, voter, etc.                    | <input type="checkbox"/> <sub>1</sub> | <input type="checkbox"/> <sub>2</sub> | <input type="checkbox"/> <sub>3</sub> | <input type="checkbox"/> <sub>4</sub> |
| 28. Être bien informé·e pour faire face à ses besoins et décider | <input type="checkbox"/> <sub>1</sub> | <input type="checkbox"/> <sub>2</sub> | <input type="checkbox"/> <sub>3</sub> | <input type="checkbox"/> <sub>4</sub> |

**B. Ressentez-vous actuellement une gêne ou une insatisfaction sur les plans suivants ?**

*Répondre à chaque ligne*

|     |                                                              | Beaucoup                              | Un peu                                | Pas du tout                           |
|-----|--------------------------------------------------------------|---------------------------------------|---------------------------------------|---------------------------------------|
| 1.  | Les ressources financières                                   | <input type="checkbox"/> <sub>1</sub> | <input type="checkbox"/> <sub>2</sub> | <input type="checkbox"/> <sub>3</sub> |
| 2.  | Le confort du logement                                       | <input type="checkbox"/> <sub>1</sub> | <input type="checkbox"/> <sub>2</sub> | <input type="checkbox"/> <sub>3</sub> |
| 3.  | Une alimentation de qualité et en suffisance                 | <input type="checkbox"/> <sub>1</sub> | <input type="checkbox"/> <sub>2</sub> | <input type="checkbox"/> <sub>3</sub> |
| 4.  | L'ambiance conviviale des repas                              | <input type="checkbox"/> <sub>1</sub> | <input type="checkbox"/> <sub>2</sub> | <input type="checkbox"/> <sub>3</sub> |
| 5.  | Les relations de couple                                      | <input type="checkbox"/> <sub>1</sub> | <input type="checkbox"/> <sub>2</sub> | <input type="checkbox"/> <sub>3</sub> |
| 6.  | Les relations familiales                                     | <input type="checkbox"/> <sub>1</sub> | <input type="checkbox"/> <sub>2</sub> | <input type="checkbox"/> <sub>3</sub> |
| 7.  | Les relations amicales                                       | <input type="checkbox"/> <sub>1</sub> | <input type="checkbox"/> <sub>2</sub> | <input type="checkbox"/> <sub>3</sub> |
| 8.  | Les relations entre générations                              | <input type="checkbox"/> <sub>1</sub> | <input type="checkbox"/> <sub>2</sub> | <input type="checkbox"/> <sub>3</sub> |
| 9.  | L'intégration à un groupe, une association, une société      | <input type="checkbox"/> <sub>1</sub> | <input type="checkbox"/> <sub>2</sub> | <input type="checkbox"/> <sub>3</sub> |
| 10. | L'estime de soi                                              | <input type="checkbox"/> <sub>1</sub> | <input type="checkbox"/> <sub>2</sub> | <input type="checkbox"/> <sub>3</sub> |
| 11. | Être écouté·e et respecté·e                                  | <input type="checkbox"/> <sub>1</sub> | <input type="checkbox"/> <sub>2</sub> | <input type="checkbox"/> <sub>3</sub> |
| 12. | Les activités culturelles et de loisirs                      | <input type="checkbox"/> <sub>1</sub> | <input type="checkbox"/> <sub>2</sub> | <input type="checkbox"/> <sub>3</sub> |
| 13. | Ne pas dépendre d'aide dans sa vie quotidienne               | <input type="checkbox"/> <sub>1</sub> | <input type="checkbox"/> <sub>2</sub> | <input type="checkbox"/> <sub>3</sub> |
| 14. | La mobilité, pouvoir se déplacer seul·e                      | <input type="checkbox"/> <sub>1</sub> | <input type="checkbox"/> <sub>2</sub> | <input type="checkbox"/> <sub>3</sub> |
| 15. | Pouvoir utiliser les transports publics seul·e               | <input type="checkbox"/> <sub>1</sub> | <input type="checkbox"/> <sub>2</sub> | <input type="checkbox"/> <sub>3</sub> |
| 16. | Pouvoir voyager                                              | <input type="checkbox"/> <sub>1</sub> | <input type="checkbox"/> <sub>2</sub> | <input type="checkbox"/> <sub>3</sub> |
| 17. | La santé physique et psychique                               | <input type="checkbox"/> <sub>1</sub> | <input type="checkbox"/> <sub>2</sub> | <input type="checkbox"/> <sub>3</sub> |
| 18. | L'accès aux soins et à la prévention                         | <input type="checkbox"/> <sub>1</sub> | <input type="checkbox"/> <sub>2</sub> | <input type="checkbox"/> <sub>3</sub> |
| 19. | Avoir une bonne assurance pour les frais de santé            | <input type="checkbox"/> <sub>1</sub> | <input type="checkbox"/> <sub>2</sub> | <input type="checkbox"/> <sub>3</sub> |
| 20. | La sécurité chez soi                                         | <input type="checkbox"/> <sub>1</sub> | <input type="checkbox"/> <sub>2</sub> | <input type="checkbox"/> <sub>3</sub> |
| 21. | La sécurité dans la rue                                      | <input type="checkbox"/> <sub>1</sub> | <input type="checkbox"/> <sub>2</sub> | <input type="checkbox"/> <sub>3</sub> |
| 22. | La religion, la philosophie, la vie spirituelle              | <input type="checkbox"/> <sub>1</sub> | <input type="checkbox"/> <sub>2</sub> | <input type="checkbox"/> <sub>3</sub> |
| 23. | Pouvoir exercer sa créativité, partager des idées            | <input type="checkbox"/> <sub>1</sub> | <input type="checkbox"/> <sub>2</sub> | <input type="checkbox"/> <sub>3</sub> |
| 24. | Pouvoir décider de sa vie quotidienne                        | <input type="checkbox"/> <sub>1</sub> | <input type="checkbox"/> <sub>2</sub> | <input type="checkbox"/> <sub>3</sub> |
| 25. | Pouvoir gérer seul·e ses affaires d'argent                   | <input type="checkbox"/> <sub>1</sub> | <input type="checkbox"/> <sub>2</sub> | <input type="checkbox"/> <sub>3</sub> |
| 26. | Être utile aux autres                                        | <input type="checkbox"/> <sub>1</sub> | <input type="checkbox"/> <sub>2</sub> | <input type="checkbox"/> <sub>3</sub> |
| 27. | Pouvoir exprimer son opinion, voter, etc.                    | <input type="checkbox"/> <sub>1</sub> | <input type="checkbox"/> <sub>2</sub> | <input type="checkbox"/> <sub>3</sub> |
| 28. | Être bien informé·e pour faire face à ses besoins et décider | <input type="checkbox"/> <sub>1</sub> | <input type="checkbox"/> <sub>2</sub> | <input type="checkbox"/> <sub>3</sub> |

**Supplementary Table 1.** QoL and health characteristics of the 2011 and 2016 samples

| Characteristics                          | Sample 2011<br>(N=976) | Sample 2016<br>(N=963) |
|------------------------------------------|------------------------|------------------------|
| <b>QoL score (OQoL-7), mean (SD)</b>     | 86.7 (16.3)            | 87.6 (15.7)            |
| <b>QoL subscores (OQoL-7), mean (SD)</b> |                        |                        |
| Material resources                       | 87.6 (18.8)            | 88.3 (18.4)            |
| Close entourage                          | 86.8 (20.3)            | 86.6 (19.4)            |
| Social and cultural life                 | 84.8 (19.5)            | 85.7 (19.4)            |
| Esteem and recognition                   | 83.3 (25.0)            | 84.3 (24.4)            |
| Health and mobility                      | 87.2 (21.3)            | 87.5 (21.8)            |
| Feeling of safety                        | 85.1 (20.9)            | 87.3 (19.9)            |
| Autonomy                                 | 90.5 (18.9)            | 91.6 (17.8)            |
| <b>Single QoL item, N (%)</b>            |                        |                        |
| Excellent                                | 79 (8.8)               | 90 (10.1)              |
| Very good                                | 287 (32.1)             | 323 (36.1)             |
| Good                                     | 480 (53.7)             | 427 (47.8)             |
| Fair                                     | 43 (4.8)               | 49 (5.5)               |
| Poor                                     | 5 (0.6)                | 5 (0.6)                |
| <b>Self-rated health, N (%)</b>          |                        |                        |
| Very good                                | 97 (9.9)               | 99 (10.3)              |
| Good                                     | 554 (56.8)             | 549 (57.0)             |
| Average                                  | 300 (30.7)             | 283 (29.4)             |
| Poor                                     | 23 (2.4)               | 30 (3.1)               |
| Very poor                                | 2 (0.2)                | 2 (0.2)                |
| <b>SF-12 (PCS), mean (SD)</b>            | 47.9 (8.9)             | 49.1 (9.1)             |
| <b>SF-12 (MCS), mean (SD)</b>            | 50.5 (9.0)             | 49.8 (9.6)             |

QoL=quality of life

**Supplementary Table 2.** Quality of the OQoL-7 data

|                          | Sample 2011 (N=1117) |       |         | Sample 2016 (N=1091) |       |         |
|--------------------------|----------------------|-------|---------|----------------------|-------|---------|
|                          | Missing              | Floor | Ceiling | Missing              | Floor | Ceiling |
| <b>QoL score, %</b>      | 1.8                  | 0.1   | 15.5    | 1.5                  | 0.0   | 18.2    |
| <b>QoL subscores, %</b>  |                      |       |         |                      |       |         |
| Material resources       | 0.5                  | 0.5   | 57.2    | 0.5                  | 0.5   | 59.6    |
| Close entourage          | 9.0                  | 1.1   | 47.7    | 7.4                  | 0.6   | 48.9    |
| Social and cultural life | 6.0                  | 0.4   | 45.2    | 4.0                  | 0.3   | 48.7    |
| Esteem and recognition   | 2.2                  | 2.8   | 60.9    | 1.8                  | 2.1   | 62.4    |
| Health and mobility      | 3.0                  | 1.2   | 51.1    | 2.3                  | 1.7   | 52.4    |
| Feeling of safety        | 3.3                  | 1.2   | 45.2    | 2.4                  | 1.3   | 51.2    |
| Autonomy                 | 3.3                  | 1.8   | 61.2    | 2.2                  | 0.7   | 66.3    |

**Supplementary Table 3.** Quality of the 28 items from the OQoL-7

| Items                                                    | Sample 2011 (N=1117) |       |         | Sample 2016 (N=1091) |       |         |
|----------------------------------------------------------|----------------------|-------|---------|----------------------|-------|---------|
|                                                          | Missing              | Floor | Ceiling | Missing              | Floor | Ceiling |
| 01. Financial resources                                  | 0.8                  | 4.6   | 63.4    | 0.7                  | 5.8   | 64.3    |
| 02. Housing comfort                                      | 0.5                  | 3.7   | 81.9    | 0.8                  | 2.7   | 84.1    |
| 03. Sufficient, good quality food                        | 1.3                  | 3.3   | 87.7    | 0.6                  | 2.6   | 88.7    |
| 04. Friendly atmosphere meals                            | 7.0                  | 4.3   | 73.8    | 4.9                  | 4.8   | 74.5    |
| 05. Couples' relationships                               | 25.0                 | 5.1   | 58.2    | 23.0                 | 5.2   | 61.1    |
| 06. Family relationships                                 | 3.9                  | 4.7   | 72.1    | 3.1                  | 3.6   | 70.6    |
| 07. Friendship relationships                             | 3.1                  | 3.7   | 78.2    | 2.6                  | 2.6   | 78.4    |
| 08. Intergenerational relationships                      | 4.5                  | 3.5   | 69.5    | 3.7                  | 2.7   | 70.4    |
| 09. Integration into a group, association or society     | 6.5                  | 6.1   | 65.7    | 5.8                  | 5.8   | 66.2    |
| 10. Self-esteem                                          | 3.9                  | 3.8   | 68.9    | 3.0                  | 4.5   | 68.9    |
| 11. Being heard and respected                            | 3.4                  | 5.0   | 67.5    | 2.9                  | 3.1   | 71.2    |
| 12. Cultural and leisure activities                      | 5.6                  | 3.2   | 67.0    | 4.0                  | 3.9   | 68.5    |
| 13. Not being dependent on help in daily life            | 3.5                  | 4.3   | 81.9    | 3.2                  | 3.4   | 83.1    |
| 14. Mobility, being able to travel alone                 | 2.2                  | 5.0   | 83.3    | 2.4                  | 6.0   | 83.9    |
| 15. Being able to use public transport alone             | 1.8                  | 5.2   | 84.3    | 1.9                  | 5.4   | 86.9    |
| 16. Being able to travel                                 | 3.6                  | 7.3   | 71.4    | 2.8                  | 6.7   | 73.2    |
| 17. Physical and mental health                           | 2.8                  | 5.8   | 60.6    | 2.3                  | 6.0   | 61.2    |
| 18. Access to health care and prevention                 | 4.8                  | 2.7   | 79.7    | 3.5                  | 2.7   | 82.5    |
| 19. Adequate health insurance coverage                   | 2.9                  | 6.1   | 75.5    | 2.4                  | 4.7   | 77.6    |
| 20. Safety at home                                       | 3.2                  | 4.8   | 77.5    | 2.0                  | 4.3   | 80.9    |
| 21. Safety in the street                                 | 3.5                  | 6.7   | 53.7    | 2.5                  | 4.9   | 60.1    |
| 22. Religion, philosophy or spiritual life               | 5.8                  | 3.7   | 72.4    | 4.4                  | 3.9   | 74.8    |
| 23. Being able to exercise one's creativity, share ideas | 5.1                  | 3.0   | 70.6    | 3.9                  | 2.5   | 74.3    |
| 24. Being able to decide on issues of daily life         | 3.6                  | 4.1   | 82.5    | 1.9                  | 3.4   | 86.3    |
| 25. Being able to manage money matters alone             | 2.6                  | 4.4   | 85.6    | 2.5                  | 3.7   | 86.0    |
| 26. Being useful to others                               | 3.7                  | 4.0   | 73.1    | 2.6                  | 2.8   | 77.4    |
| 27. Being able to express one's opinion, to vote, etc.   | 3.0                  | 3.3   | 82.1    | 2.2                  | 2.8   | 85.5    |
| 28. Being well informed to meet one's needs and decide   | 2.8                  | 3.7   | 79.8    | 2.3                  | 2.8   | 82.4    |

**Supplementary Table 4.** Construct validity: QoL domain subscores in the presence or absence of two stressful events (last 12 months, sample 2016)

| Domains                                  | Financial difficulties |                  |                                       | Relationship difficulties |                  |                                       |
|------------------------------------------|------------------------|------------------|---------------------------------------|---------------------------|------------------|---------------------------------------|
|                                          | No                     | Yes              | Effect size                           | No                        | Yes              | Effect size                           |
|                                          | <i>Mean (SD)</i>       | <i>Mean (SD)</i> | <i>Cohen's d (95% CI)<sup>a</sup></i> | <i>Mean (SD)</i>          | <i>Mean (SD)</i> | <i>Cohen's d (95% CI)<sup>a</sup></i> |
| <b>Material resources (N=1083)</b>       | 90.1 (17.0)            | 61.4 (23.8)      | 1.63 (1.31 to 1.95)                   | 88.3 (18.7)               | 79.8 (25.6)      | 0.44 (0.03; 0.86)                     |
| <b>Close entourage (N=1007)</b>          | 87.1 (19.1)            | 76.8 (24.9)      | 0.53 (0.22 to 0.83)                   | 87.2 (19.2)               | 66.8 (21.9)      | 1.05 (0.69; 1.42)                     |
| <b>Social and cultural life (N=1044)</b> | 85.4 (19.9)            | 81.3 (21.2)      | 0.21 (-0.05 to 0.46)                  | 85.5 (19.5)               | 74.9 (28.7)      | 0.53 (0.11; 0.96)                     |
| <b>Esteem and recognition (N=1068)</b>   | 84.4 (24.4)            | 76.3 (28.4)      | 0.33 (0.07 to 0.59)                   | 84.5 (24.5)               | 69.2 (26.6)      | 0.62 (0.25; 0.99)                     |
| <b>Health and mobility (N=1063)</b>      | 87.7 (21.5)            | 77.1 (29.8)      | 0.48 (0.20 to 0.77)                   | 87.3 (22.0)               | 78.6 (26.6)      | 0.39 (0.01; 0.78)                     |
| <b>Feeling of safety (N=1062)</b>        | 87.6 (19.8)            | 74.0 (29.0)      | 0.66 (0.36 to 0.96)                   | 87.0 (20.5)               | 76.5 (27.6)      | 0.51 (0.09; 0.93)                     |
| <b>Autonomy (N=1064)</b>                 | 91.9 (17.6)            | 82.2 (28.0)      | 0.53 (0.21 to 0.84)                   | 91.6 (18.3)               | 82.4 (24.6)      | 0.50 (0.08; 0.91)                     |

SD=standard deviation; CI=confidence interval

<sup>a</sup> Effect size was interpreted as small (>0.2), medium (>0.5), or large (>0.8) [24]



**Supplementary Table 5.** Construct validity: Effect size (Cohen's d) of the difference in QoL domain subscores in the presence or absence of twenty stressful events (last 12 months, sample 2011)

| Events                                                       | Material<br>resources<br>(N=1108) | Close<br>entourage<br>(N=1014) | Social and<br>cultural life<br>(N=1047) | Esteem and<br>recognition<br>(N=1089) | Health and<br>mobility<br>(N=1080) | Feeling of<br>safety<br>(N=1076) | Autonomy<br>(N=1076) |
|--------------------------------------------------------------|-----------------------------------|--------------------------------|-----------------------------------------|---------------------------------------|------------------------------------|----------------------------------|----------------------|
| 1. Financial difficulties                                    | 1.34 ***                          | 0.46 *                         | 0.49 **                                 | 0.37 *                                | 0.40 **                            | 0.60 ***                         | 0.50 **              |
| 2. New major physical illness                                | 0.12                              | 0.03                           | 0.13                                    | 0.09                                  | 0.19 *                             | 0.04                             | 0.10                 |
| 3. Other major physical illness                              | 0.20 *                            | 0.35 **                        | 0.17 *                                  | 0.19                                  | 0.51 ***                           | 0.19 *                           | 0.30 **              |
| 4. Physical illness of close family member                   | 0.12                              | 0.15 *                         | 0.16 *                                  | 0.10                                  | 0.10                               | 0.04                             | 0.07                 |
| 5. Accident/injury                                           | 0.05                              | 0.01                           | 0.11                                    | -0.01                                 | 0.16                               | -0.01                            | 0.01                 |
| 6. Marital separation/divorce                                | 0.05                              | 0.30                           | 0.13                                    | 0.31                                  | -0.14                              | 0.43                             | 0.52                 |
| 7. Other marital difficulties                                | 0.60 **                           | 0.98 ***                       | 0.59 **                                 | 0.51 **                               | 0.26                               | 0.14                             | 0.68 **              |
| 8. Major family problems/conflicts<br>other than with spouse | 0.40 **                           | 0.60 ***                       | 0.29 *                                  | 0.42 **                               | 0.15                               | 0.36 *                           | 0.13                 |
| 9. Major problems/conflicts with<br>friends/neighbours       | 0.46 *                            | 0.69 **                        | 0.34                                    | 0.57 **                               | 0.29                               | 0.54 **                          | 0.36                 |
| 10. Death of spouse                                          | -0.02                             | 0.32                           | 0.09                                    | 0.20                                  | 0.30                               | 0.07                             | 0.27                 |

**Supplementary Table 5.** (Continued)

| Events                                                   | Material<br>resources<br>(N=1108) | Close<br>entourage<br>(N=1014) | Social and<br>cultural life<br>(N=1047) | Esteem and<br>recognition<br>(N=1089) | Health and<br>mobility<br>(N=1080) | Feeling of<br>safety<br>(N=1076) | Autonomy<br>(N=1076) |
|----------------------------------------------------------|-----------------------------------|--------------------------------|-----------------------------------------|---------------------------------------|------------------------------------|----------------------------------|----------------------|
| 11. Death of child                                       | 1.49                              | 2.47 *                         | 0.78                                    | 1.28                                  | 1.67                               | 1.61                             | 1.94                 |
| 12. Death of parent                                      | -0.35                             | -0.16                          | 0.66                                    | 0.58                                  | 0.17                               | 0.13                             | 0.02                 |
| 13. Death of brother/sister                              | 0.25                              | -0.01                          | 0.28                                    | 0.22                                  | 0.29                               | 0.31                             | 0.16                 |
| 14. Death of other relative/close friend                 | 0.20 *                            | 0.18 *                         | 0.12                                    | 0.09                                  | 0.05                               | 0.10                             | 0.04                 |
| 15. Death of pet                                         | 0.27                              | 0.06                           | 0.16                                    | -0.04                                 | -0.05                              | 0.19                             | -0.13                |
| 16. Forced to leave/lose home                            | 0.73 *                            | 0.41                           | 0.45                                    | 0.36                                  | 0.38                               | 0.58                             | 0.53                 |
| 17. Voluntarily changed place of residence               | 0.42                              | 0.63                           | 1.06 **                                 | 0.43                                  | 0.19                               | -0.06                            | 0.33                 |
| 18. Difficulty getting adequate<br>professional services | 1.42 ***                          | 0.93 *                         | 0.58                                    | 0.69                                  | 0.73                               | 1.06 ***                         | 1.33 *               |
| 19. Victim of crime                                      | 0.26                              | 0.26                           | 0.34 *                                  | 0.24                                  | 0.08                               | 0.19                             | 0.24                 |
| 20. Became caretaker for relative/friend                 | 0.29 *                            | 0.27 *                         | 0.23                                    | 0.26 *                                | 0.01                               | 0.12                             | 0.12                 |

<sup>a</sup> Effect size was interpreted as small (>0.2), medium (>0.5), or large (>0.8) [24]

\* P<0.05 ; \*\* P<0.01 ; \*\*\* P<0.001

**Supplementary Table 6.** Construct validity: Effect size (Cohen's d) of the difference in QoL domain subscores in the presence or absence of twenty stressful events (last 12 months, sample 2016)

| Events                                                       | Material<br>resources<br>(N=1083) | Close<br>entourage<br>(N=1007) | Social and<br>cultural life<br>(N=1044) | Esteem and<br>recognition<br>(N=1068) | Health and<br>mobility<br>(N=1063) | Feeling of<br>safety<br>(N=1062) | Autonomy<br>(N=1064) |
|--------------------------------------------------------------|-----------------------------------|--------------------------------|-----------------------------------------|---------------------------------------|------------------------------------|----------------------------------|----------------------|
| 1. Financial difficulties                                    | 1.63 ***                          | 0.53 **                        | 0.21                                    | 0.33 *                                | 0.48 **                            | 0.66 ***                         | 0.53 **              |
| 2. New major physical illness                                | 0.14                              | 0.10                           | 0.10                                    | 0.10                                  | 0.25 **                            | 0.05                             | 0.00                 |
| 3. Other major physical illness                              | 0.36 **                           | 0.10                           | 0.38 **                                 | 0.19                                  | 0.75 ***                           | 0.31 **                          | 0.33 **              |
| 4. Physical illness of close family member                   | 0.03                              | -0.02                          | 0.14                                    | 0.01                                  | -0.07                              | 0.05                             | -0.02                |
| 5. Accident/injury                                           | 0.07                              | 0.00                           | -0.11                                   | -0.14                                 | 0.02                               | 0.00                             | -0.12                |
| 6. Marital separation/divorce                                | 0.60                              | 0.88                           | 0.34                                    | 0.50                                  | 0.49                               | 0.52                             | 0.43                 |
| 7. Other marital difficulties                                | 0.51                              | 1.18 ***                       | 0.77 **                                 | 0.77 ***                              | 0.50 *                             | 0.56 *                           | 0.70 **              |
| 8. Major family problems/conflicts<br>other than with spouse | -0.01                             | 0.40 **                        | 0.06                                    | 0.30 *                                | 0.11                               | 0.10                             | 0.18                 |
| 9. Major problems/conflicts with<br>friends/neighbours       | 1.16 **                           | 0.76 *                         | 0.86 **                                 | 0.96 ***                              | 0.86 *                             | 1.28 ***                         | 1.08 **              |
| 10. Death of spouse                                          | 0.18                              | 0.50                           | 0.03                                    | 0.41                                  | 0.10                               | 0.10                             | 0.19                 |

**Supplementary Table 6.** (Continued)

| Events                                                   | Material<br>resources<br>(N=1083) | Close<br>entourage<br>(N=1007) | Social and<br>cultural life<br>(N=1044) | Esteem and<br>recognition<br>(N=1068) | Health and<br>mobility<br>(N=1063) | Feeling of<br>safety<br>(N=1062) | Autonomy<br>(N=1064) |
|----------------------------------------------------------|-----------------------------------|--------------------------------|-----------------------------------------|---------------------------------------|------------------------------------|----------------------------------|----------------------|
| 11. Death of child                                       | 1.25 **                           | 0.63                           | 0.42                                    | 0.80                                  | 1.15                               | 0.86                             | 0.68                 |
| 12. Death of parent                                      | 0.74                              | 0.43                           | 0.95                                    | 0.77                                  | 0.90                               | 0.76                             | 1.40 *               |
| 13. Death of brother/sister                              | 0.17                              | 0.13                           | 0.10                                    | 0.20                                  | 0.13                               | 0.17                             | 0.27                 |
| 14. Death of other relative/close friend                 | 0.05                              | 0.10                           | 0.07                                    | 0.09                                  | 0.11                               | 0.11                             | 0.05                 |
| 15. Death of pet                                         | 0.28                              | 0.05                           | 0.04                                    | 0.16                                  | 0.49 *                             | 0.15                             | 0.27                 |
| 16. Forced to leave/lose home                            | 0.11                              | 0.35                           | 0.77                                    | -0.03                                 | 0.44                               | 0.33                             | 0.64                 |
| 17. Voluntarily changed place of residence               | 0.10                              | 0.08                           | 0.10                                    | 0.14                                  | 0.16                               | 0.15                             | 0.26                 |
| 18. Difficulty getting adequate<br>professional services | 1.14 **                           | 0.65 *                         | 0.83 ***                                | 0.56                                  | 1.30 ***                           | 0.56 **                          | 0.66 *               |
| 19. Victim of crime                                      | 0.67 *                            | 0.64 **                        | -0.04                                   | 0.12                                  | 0.18                               | 0.55 *                           | 0.24                 |
| 20. Became caretaker for relative/friend                 | -0.06                             | 0.01                           | 0.10                                    | 0.03                                  | -0.03                              | -0.07                            | -0.09                |

<sup>a</sup> Effect size was interpreted as small (>0.2), medium (>0.5), or large (>0.8) [24]

\* P<0.05 ; \*\* P<0.01 ; \*\*\* P<0.001

**Supplementary Table 7.** Construct validity: correlations between QoL items and domains (sample 2011)

| Items (Domains)                                                  | Material resources | Close entourage | Social and cultural life | Esteem and recognition | Health and mobility | Feeling of safety | Autonomy |
|------------------------------------------------------------------|--------------------|-----------------|--------------------------|------------------------|---------------------|-------------------|----------|
| (Material resources)                                             |                    |                 |                          |                        |                     |                   |          |
| 01. Financial resources (N=970)                                  | 0.37               | 0.22            | 0.25                     | 0.24                   | 0.21                | 0.27              | 0.27     |
| 02. Housing comfort (N=972)                                      | 0.41               | 0.31            | 0.27                     | 0.33                   | 0.31                | 0.35              | 0.31     |
| 03. Sufficient, good quality food (N=970)                        | 0.40               | 0.39            | 0.25                     | 0.35                   | 0.32                | 0.34              | 0.36     |
| (Close entourage)                                                |                    |                 |                          |                        |                     |                   |          |
| 04. Friendly atmosphere meals (N=965)                            | 0.29               | 0.46            | 0.28                     | 0.37                   | 0.31                | 0.24              | 0.31     |
| 05. Couples' relationships (N=812)                               | 0.28               | 0.50            | 0.28                     | 0.38                   | 0.25                | 0.20              | 0.30     |
| 06. Family relationships (N=971)                                 | 0.29               | 0.59            | 0.33                     | 0.46                   | 0.30                | 0.29              | 0.37     |
| 07. Friendship relationships (N=970)                             | 0.32               | 0.47            | 0.41                     | 0.46                   | 0.34                | 0.36              | 0.43     |
| 08. Intergenerational relationships (N=966)                      | 0.24               | 0.52            | 0.35                     | 0.46                   | 0.32                | 0.34              | 0.37     |
| (Social and cultural life)                                       |                    |                 |                          |                        |                     |                   |          |
| 09. Integration into a group, association or society (N=957)     | 0.23               | 0.28            | 0.44                     | 0.36                   | 0.31                | 0.27              | 0.33     |
| 12. Cultural and leisure activities (N=963)                      | 0.24               | 0.34            | 0.49                     | 0.38                   | 0.39                | 0.33              | 0.38     |
| 22. Religion, philosophy or spiritual life (N=962)               | 0.16               | 0.25            | 0.43                     | 0.29                   | 0.26                | 0.29              | 0.33     |
| 23. Being able to exercise one's creativity, share ideas (N=966) | 0.28               | 0.43            | 0.49                     | 0.49                   | 0.41                | 0.42              | 0.57     |

**Supplementary Table 7.** (Continued)

| Items                                                 | Material resources | Close entourage | Social and cultural life | Esteem and recognition | Health and mobility | Feeling of safety | Autonomy |
|-------------------------------------------------------|--------------------|-----------------|--------------------------|------------------------|---------------------|-------------------|----------|
| (Esteem and recognition)                              |                    |                 |                          |                        |                     |                   |          |
| 10. Self-esteem (N=958)                               | 0.31               | 0.44            | 0.43                     | 0.60                   | 0.40                | 0.37              | 0.46     |
| 11. Being heard and respected (N=958)                 | 0.31               | 0.55            | 0.49                     | 0.60                   | 0.38                | 0.38              | 0.46     |
| (Health and mobility)                                 |                    |                 |                          |                        |                     |                   |          |
| 13. Not being dependent on help in daily life (N=964) | 0.28               | 0.29            | 0.34                     | 0.35                   | 0.47                | 0.34              | 0.43     |
| 14. Mobility, being able to travel alone (N=970)      | 0.24               | 0.26            | 0.32                     | 0.31                   | 0.57                | 0.39              | 0.43     |
| 15. Being able to use public transport alone (N=970)  | 0.25               | 0.23            | 0.34                     | 0.28                   | 0.52                | 0.39              | 0.42     |
| 16. Being able to travel (N=965)                      | 0.23               | 0.28            | 0.40                     | 0.31                   | 0.54                | 0.46              | 0.48     |
| 17. Physical and mental health (N=970)                | 0.26               | 0.33            | 0.39                     | 0.41                   | 0.52                | 0.47              | 0.47     |
| (Feeling of safety)                                   |                    |                 |                          |                        |                     |                   |          |
| 18. Access to health care and prevention (N=961)      | 0.38               | 0.32            | 0.39                     | 0.37                   | 0.47                | 0.44              | 0.45     |
| 19. Adequate health insurance coverage (N=971)        | 0.42               | 0.32            | 0.35                     | 0.34                   | 0.39                | 0.46              | 0.43     |
| 20. Safety at home (N=965)                            | 0.32               | 0.35            | 0.32                     | 0.37                   | 0.40                | 0.55              | 0.41     |
| 21. Safety in the street (N=965)                      | 0.22               | 0.29            | 0.35                     | 0.31                   | 0.42                | 0.48              | 0.40     |

**Supplementary Table 7.** (Continued)

| Items                                                          | Material resources | Close entourage | Social and cultural life | Esteem and recognition | Health and mobility | Feeling of safety | Autonomy |
|----------------------------------------------------------------|--------------------|-----------------|--------------------------|------------------------|---------------------|-------------------|----------|
| (Autonomy)                                                     |                    |                 |                          |                        |                     |                   |          |
| 24. Being able to decide on issues of daily life (N=967)       | 0.31               | 0.36            | 0.42                     | 0.43                   | 0.47                | 0.38              | 0.53     |
| 25. Being able to manage money matters alone (N=971)           | 0.27               | 0.29            | 0.30                     | 0.36                   | 0.42                | 0.39              | 0.48     |
| 26. Being useful to others (N=967)                             | 0.29               | 0.42            | 0.43                     | 0.42                   | 0.45                | 0.39              | 0.50     |
| 27. Being able to express one's opinion, to vote, etc. (N=971) | 0.28               | 0.36            | 0.40                     | 0.42                   | 0.43                | 0.42              | 0.57     |
| 28. Being well informed to meet one's needs and decide (N=971) | 0.36               | 0.38            | 0.45                     | 0.44                   | 0.46                | 0.49              | 0.58     |

Note: for each item, its corresponding QoL subscore was recalculated without the item itself.

**Supplementary Table 8.** Construct validity: correlations between QoL items and domains (sample 2016)

| Items (Domains)                                                  | Material resources | Close entourage | Social and cultural life | Esteem and recognition | Health and mobility | Feeling of safety | Autonomy |
|------------------------------------------------------------------|--------------------|-----------------|--------------------------|------------------------|---------------------|-------------------|----------|
| (Material resources)                                             |                    |                 |                          |                        |                     |                   |          |
| 01. Financial resources (N=975)                                  | 0.42               | 0.31            | 0.24                     | 0.31                   | 0.30                | 0.38              | 0.28     |
| 02. Housing comfort (N=978)                                      | 0.41               | 0.34            | 0.19                     | 0.30                   | 0.31                | 0.38              | 0.30     |
| 03. Sufficient, good quality food (N=978)                        | 0.42               | 0.39            | 0.29                     | 0.36                   | 0.34                | 0.36              | 0.39     |
| (Close entourage)                                                |                    |                 |                          |                        |                     |                   |          |
| 04. Friendly atmosphere meals (N=977)                            | 0.35               | 0.52            | 0.30                     | 0.42                   | 0.32                | 0.28              | 0.32     |
| 05. Couples' relationships (N=815)                               | 0.28               | 0.45            | 0.27                     | 0.36                   | 0.27                | 0.21              | 0.26     |
| 06. Family relationships (N=976)                                 | 0.33               | 0.58            | 0.33                     | 0.43                   | 0.30                | 0.36              | 0.35     |
| 07. Friendship relationships (N=972)                             | 0.32               | 0.54            | 0.42                     | 0.44                   | 0.34                | 0.36              | 0.43     |
| 08. Intergenerational relationships (N=968)                      | 0.27               | 0.54            | 0.42                     | 0.41                   | 0.31                | 0.35              | 0.37     |
| (Social and cultural life)                                       |                    |                 |                          |                        |                     |                   |          |
| 09. Integration into a group, association or society (N=956)     | 0.16               | 0.33            | 0.52                     | 0.40                   | 0.33                | 0.30              | 0.36     |
| 12. Cultural and leisure activities (N=973)                      | 0.26               | 0.36            | 0.54                     | 0.37                   | 0.43                | 0.35              | 0.42     |
| 22. Religion, philosophy or spiritual life (N=967)               | 0.13               | 0.28            | 0.38                     | 0.27                   | 0.24                | 0.23              | 0.35     |
| 23. Being able to exercise one's creativity, share ideas (N=969) | 0.28               | 0.42            | 0.54                     | 0.44                   | 0.40                | 0.37              | 0.53     |



**Supplementary Table 8.** (Continued)

| Items                                                 | Material resources | Close entourage | Social and cultural life | Esteem and recognition | Health and mobility | Feeling of safety | Autonomy |
|-------------------------------------------------------|--------------------|-----------------|--------------------------|------------------------|---------------------|-------------------|----------|
| (Esteem and recognition)                              |                    |                 |                          |                        |                     |                   |          |
| 10. Self-esteem (N=972)                               | 0.34               | 0.43            | 0.45                     | 0.58                   | 0.40                | 0.38              | 0.45     |
| 11. Being heard and respected (N=972)                 | 0.34               | 0.51            | 0.43                     | 0.58                   | 0.41                | 0.40              | 0.47     |
| (Health and mobility)                                 |                    |                 |                          |                        |                     |                   |          |
| 13. Not being dependent on help in daily life (N=972) | 0.31               | 0.26            | 0.39                     | 0.33                   | 0.48                | 0.38              | 0.45     |
| 14. Mobility, being able to travel alone (N=974)      | 0.30               | 0.25            | 0.35                     | 0.34                   | 0.58                | 0.41              | 0.43     |
| 15. Being able to use public transport alone (N=976)  | 0.33               | 0.28            | 0.36                     | 0.37                   | 0.56                | 0.43              | 0.43     |
| 16. Being able to travel (N=976)                      | 0.31               | 0.32            | 0.44                     | 0.37                   | 0.54                | 0.41              | 0.44     |
| 17. Physical and mental health (N=975)                | 0.29               | 0.37            | 0.36                     | 0.40                   | 0.51                | 0.43              | 0.40     |
| (Feeling of safety)                                   |                    |                 |                          |                        |                     |                   |          |
| 18. Access to health care and prevention (N=974)      | 0.36               | 0.34            | 0.36                     | 0.36                   | 0.44                | 0.42              | 0.45     |
| 19. Adequate health insurance coverage (N=977)        | 0.45               | 0.35            | 0.30                     | 0.37                   | 0.38                | 0.42              | 0.40     |
| 20. Safety at home (N=977)                            | 0.34               | 0.30            | 0.29                     | 0.34                   | 0.39                | 0.54              | 0.42     |
| 21. Safety in the street (N=973)                      | 0.30               | 0.32            | 0.38                     | 0.35                   | 0.40                | 0.47              | 0.40     |

**Supplementary Table 8.** (Continued)

| Items                                                          | Material resources | Close entourage | Social and cultural life | Esteem and recognition | Health and mobility | Feeling of safety | Autonomy |
|----------------------------------------------------------------|--------------------|-----------------|--------------------------|------------------------|---------------------|-------------------|----------|
| (Autonomy)                                                     |                    |                 |                          |                        |                     |                   |          |
| 24. Being able to decide on issues of daily life (N=976)       | 0.31               | 0.36            | 0.41                     | 0.41                   | 0.44                | 0.39              | 0.50     |
| 25. Being able to manage money matters alone (N=972)           | 0.33               | 0.30            | 0.36                     | 0.36                   | 0.39                | 0.43              | 0.51     |
| 26. Being useful to others (N=977)                             | 0.26               | 0.36            | 0.47                     | 0.36                   | 0.41                | 0.35              | 0.47     |
| 27. Being able to express one's opinion, to vote, etc. (N=978) | 0.25               | 0.33            | 0.44                     | 0.38                   | 0.30                | 0.36              | 0.52     |
| 28. Being well informed to meet one's needs and decide (N=978) | 0.36               | 0.37            | 0.38                     | 0.45                   | 0.40                | 0.46              | 0.57     |

Note: for each item, its corresponding QoL subscore was recalculated without the item itself.
